# Supplementary material for: Costs and expected gain in lifetime health from intensive care versus general ward care of 30,712 individual patients: a distribution-weighted cost-effectiveness analysis
Source: Springer Nature journal article supplement (doi:10.1186/s13054-017-1792-0), 2017-08-21
Supplement: MOESM1 [file 14233268]

## Additional file 1

### General search strategy:

We developed the general and specific search strategies from a knowledge base of ten publications [1-10]. With the objective to update the previous model with effect and cost assumptions and quality-adjustment weights [11], we first

- 1) searched for previous cost-effectiveness analyses (CEAs) and reviews of the effectiveness of intensive care using selected databases (Tufts CEA registry, - 2013, Cochrane library 2005-16 and Pubmed Health); then
- 2) searched for single studies of the benefit of ICU admission vs. non-intensive care from the year 2011 using Pubmed (Medline); then
- 3) performed a citation search (Web of Science, 2006 -) for the articles in the knowledge base and those included from Pubmed results; and finally
- 4) went through the references in the articles that were selected in steps 1)-3).

We assessed retrievals in English (title, abstracts, or full text articles) according to their relevance to the PICO and exclusion criteria below. The quality of the studies was not assessed systematically. Lindemark performed the literature search and assessment.

| PICO         | Characteristics                                                                                                                                        |
|--------------|--------------------------------------------------------------------------------------------------------------------------------------------------------|
| Patients     | Referred to the ICU. General ICU patients. Patients in intensive care or critical care wards. Adults, age 18+.                                         |
| Intervention | ICU admission. Intensive care. Critical care. ICU triage. ICU gatekeeping. Decision to admit to the ICU.                                               |
| Comparator   | Non-intensive care. General ward care. Refused, denied or delayed ICU care for any reason (too sick or too well to benefit, full bed-occupancy, other) |
| Outcome      | Mortality, short- or long-term. Life years. Quality-adjusted life years.                                                                               |

### Exclusion criteria:

Studies

- from which no survival benefit from ICU admission is reported/can be estimated
- reporting only ICU mortality
- of specific interventions within intensive care, e.g. early goal-directed therapy for sepsis
- of narrowly selected groups of ICU patients, e.g. neurosurgical patients, only old age
- of patients with age under 18
- assuming that patients die if not admitted to the ICU
- using "do nothing" as comparator to ICU admission

The results of the systematic search for studies are shown in Table 1. The results of the search for utilities from the Tufts registry are shown in Table 2.

Table S1: Results of systematic search based on PICO

| Source                 | Article type/database       | n retrievals       | n excluded** | Fulltexts evaluated              | Included | Objective/Intervention                   | Comparator                     | Remarks                                                                                                     |               |
|------------------------|-----------------------------|--------------------|--------------|----------------------------------|----------|------------------------------------------|--------------------------------|-------------------------------------------------------------------------------------------------------------|---------------|
| Tufts registry of CEAs | CEAs (updated through 2013) | Intensive care: 54 | 46           | Linko CC 2010                    | No       | MV for acute respiratory failure         | None                           | Patient-level data. Describe average cost per QALY.                                                         |               |
|                        |                             |                    |              | Karlsson CCM 2009                | No       | Intensive care, severe sepsis            | None                           | Patient-level data. Model. Finland. Describe average cost per QALY.                                         |               |
|                        |                             |                    |              | Graf CC 2008                     | No       | ICU adm after cardiac arrest             | None                           | Patient-level data. Model. Germany. Describe average cost per QALY                                          |               |
|                        |                             |                    |              | Huang CCM 2007                   | No       | Goal-directed, sepsis                    |                                |                                                                                                             |               |
|                        |                             |                    |              | Ridley Anaesthesia 2007          | Yes      | ICU admission adults                     | General ward care              | Hypothetical cohort, UK, model. Review of effectiveness of ICU admission, Sinuff 2004 + three more articles |               |
|                        |                             |                    |              | Graf CCM 2005                    | No       | Intensive care, medical admissions       | Do nothing/No ICU care = death | Patient-level data. Model. Germany. Report cost per QALY.                                                   |               |
|                        |                             |                    |              | Critical care: 14                | 13       | Hutchings BMJ 2009                       | No                             | Modernisation of adult intensive care                                                                       |               |
|                        |                             |                    |              | ICU admission: 1                 | 1        |                                          |                                | 0                                                                                                           |               |
|                        |                             |                    |              | Intensive care unit: 39          | 38       | Talmor CCM 2008                          | No                             | Integrated sepsis protocol                                                                                  |               |
|                        |                             |                    |              | Triage: 21                       | 21       |                                          |                                | 0                                                                                                           |               |
| Cochrane library       |                             |                    |              | CDSR (issue 2, Feb 2016)         |          |                                          |                                | 0                                                                                                           |               |
|                        |                             |                    |              | DARE (issue 2, April 2015*)      |          |                                          |                                | 0                                                                                                           |               |
|                        |                             |                    |              | CCRCT (issue 1, Jan 2016)        |          |                                          |                                | 0                                                                                                           |               |
|                        |                             |                    |              | HTA database (issue 1, Jan 2016) |          |                                          |                                | 0                                                                                                           |               |
|                        |                             |                    |              | NHS EED (issue 2, Apr 2015*)     | 71       | 70                                       | Edbrooke CC 2011               | Yes                                                                                                         | ICU admission |
| PubMed Health          |                             | 669                | 669          |                                  |          |                                          | 0                              |                                                                                                             |               |
| PubMed                 | All                         | 1083               | 1076         | Louriz ICM 2012                  | Yes      | ICU admission                            | Delayed ICU admission          |                                                                                                             |               |
|                        |                             |                    |              | Robert 2012 Am J R CCM           | Yes      | ICU admission                            | Delayed ICU admission          |                                                                                                             |               |
|                        |                             |                    |              | Sprung CCM 2012                  | Yes      | ICU admission                            | ICU admission rejected         | ELDICUS study, part II. Multi-centre, Europe.                                                               |               |
|                        |                             |                    |              | Howe AAIC 2011                   | No       |                                          |                                | n very low                                                                                                  |               |
|                        |                             |                    |              | O'Callaghan CC 2012              | No       | ICU admission                            | Delayed ICU admission          | Special case with boarding in theatre suite while waiting for available ICU bed                             |               |
|                        |                             |                    |              | Cardoso CC 2011                  | No       | ICU admission                            | Delayed ICU admission          | ICU mortality                                                                                               |               |
|                        |                             |                    |              | Simchen CCM 2007                 | No       | ICU admission                            | Other ward care                | Newly deteriorating patients who may be eligible to ICU. Specific a priori triage system.                   |               |
| Web of Science         | All, citation search        |                    |              | Iapichino ICM 2010               | No       | ICU admission                            | ICU admission rejected         | ELDICUS project                                                                                             |               |
|                        |                             |                    |              | Boumendil Plos One 2012          | No       | Analysis of variability of ICU admission |                                | Age 80+                                                                                                     |               |
|                        |                             |                    |              | Orsini JOCMR 2014                | No       |                                          |                                | Only overall hospital mortality                                                                             |               |
| Reference review       | All                         |                    |              | Garrouste-Orgeas ICM 2006        | No       |                                          |                                | Age 80+                                                                                                     |               |
|                        |                             |                    |              | Garrouste-Orgeas CCM 2009        | No       |                                          |                                | Age 80+                                                                                                     |               |
|                        |                             |                    |              | Shmueli JTAHC 2005               | Yes      | ICU admission                            | ICU refusal                    | Hospital survival benefit and APACHE II score                                                               |               |
|                        |                             |                    |              | Sznajder ICM 2001                | No       | ICU stay (81.5% medical)                 | Do nothing/No ICU care = death | Report cost per QALY.                                                                                       |               |
|                        |                             |                    |              | Kerridge Anae. IC 1995           | No       | Analysis of QALYs in intensive care      |                                |                                                                                                             |               |

\* Include publications up to March 2015

\*\* Excluded based on title or abstract

Table S1: Results of search for utilities among ICU patients and survivors in CEA registry

| Database           | Retrievals                               | Author, journal year                                                  | Health state                                              | Utility                    |                                                                      |           |
|--------------------|------------------------------------------|-----------------------------------------------------------------------|-----------------------------------------------------------|----------------------------|----------------------------------------------------------------------|-----------|
| Tuft CEA registry  | 1 intensive care unit: 95                | Lehmann CC 2010                                                       | ICU sepsis                                                | 0,68                       |                                                                      |           |
|                    |                                          | Linko CC 2010                                                         | One year after ICU                                        | 0,7                        |                                                                      |           |
|                    |                                          | Cuthbertson BMJ 2009                                                  | One year Post ICU discharge<br>std care/with intervention | 0.6/0.58                   |                                                                      |           |
|                    |                                          |                                                                       | 6 months post ICU discharge<br>std care/with intervention | 0.62/0.63                  |                                                                      |           |
|                    | Halton CC 2009                           |                                                                       | ICU patients 80 years +                                   | 0,66                       |                                                                      |           |
|                    |                                          |                                                                       | 70-79 years old                                           | 0,75                       |                                                                      |           |
|                    |                                          |                                                                       | 60-69 years old                                           | 0,79                       |                                                                      |           |
|                    |                                          |                                                                       | 50-59 years old                                           | 0,8                        |                                                                      |           |
|                    | Graf CC 2008                             |                                                                       | ICU admission                                             | 0,66                       |                                                                      |           |
|                    |                                          |                                                                       | 5 years post cardiac arrest and ICU survival, women       | 0,87                       |                                                                      |           |
|                    |                                          |                                                                       | 5 years post cardiac arrest and ICU survival, men         | 0,74                       |                                                                      |           |
|                    | Graf CCM 2005                            |                                                                       | Survival after ICU stay                                   | 0,88                       |                                                                      |           |
|                    | MacLaren ValueHealth 2005                |                                                                       | Post ICU health state                                     | 0,62                       |                                                                      |           |
|                    | Davies Anaesthesia 2005                  |                                                                       | Survivors of severe sepsis                                | 0,69                       |                                                                      |           |
|                    | Sznajder ICM 2001                        |                                                                       | 6 months after stay in ICU for:                           |                            |                                                                      |           |
|                    |                                          |                                                                       | SAPS II<50                                                | 0,52                       |                                                                      |           |
|                    |                                          |                                                                       | SAPS 35<50                                                | 0,57                       |                                                                      |           |
|                    |                                          |                                                                       | SAPS 20<35                                                | 0,68                       |                                                                      |           |
|                    |                                          |                                                                       | SAPS <20                                                  | 0,64                       |                                                                      |           |
|                    |                                          |                                                                       | Acute surgery admission                                   | 0,7                        |                                                                      |           |
|                    |                                          |                                                                       | Elective surgery admission                                | 0,71                       |                                                                      |           |
|                    |                                          |                                                                       | Medical admission                                         | 0,61                       |                                                                      |           |
|                    |                                          |                                                                       | Age > 65                                                  | 0,63                       |                                                                      |           |
|                    |                                          |                                                                       | Age 40-64                                                 | 0,58                       |                                                                      |           |
|                    |                                          |                                                                       | Age < 40                                                  | 0,93                       |                                                                      |           |
|                    |                                          |                                                                       | Average self-assessment                                   | 0,63                       |                                                                      |           |
|                    |                                          |                                                                       | Kerridge ANAE IC 1995                                     |                            | Post-treatment for APACHE II 0-35+                                   | 0.96-0.85 |
|                    |                                          |                                                                       | 2 critical care, 27                                       | Sud AmJRespC 2011          | Former ICU patients discharged from hospital to home or nursing home | 0,68      |
|                    | Edwards 2012                             | UK patients recovering on the ward after discharge from critical care |                                                           |                            |                                                                      |           |
|                    | UK patients in critical care ; best case | 0,726317                                                              |                                                           |                            |                                                                      |           |
|                    |                                          |                                                                       | UK patients in critical care ; best case                  | 0,598                      |                                                                      |           |
|                    | 3 intensive care: 131                    | Ridley Anaesthesia 2007                                               | Survived ICU                                              | 0,66                       |                                                                      |           |
|                    |                                          |                                                                       | Green IntJTAHC                                            | Survivors of severe sepsis | 0,6                                                                  |           |
| 4 ICU admission: 1 |                                          |                                                                       |                                                           |                            |                                                                      |           |

## Specific search strategies:

### CEA registry

Basic search Dec 9 2015. Retrievals through 2013.

For cost-effectiveness analyses:

Search terms (only new retrievals was added when using the following search term).

- 1 intensive care
- 2 critical care
- 3 ICU admission
- 4 intensive care unit
- 5 triage

For utilities (health-related quality of life weights):

Search terms (only new retrievals were added when using the following search term).

- 1 intensive care unit
- 2 critical care
- 3 intensive care
- 4 ICU admission

Studies were recorded if the health states were relevant to patients in or after ICU.

### Cochrane library, all databases: 661 retrievals

Search Name: ICU admission MESH search

Last Saved: 26.02.16 09:24

ID Search

- #1 MeSH descriptor: [Critical Care] explode all trees
- #2 MeSH descriptor: [Intensive Care Units] explode all trees
- #3 #1 or #2
- #4 MeSH descriptor: [Referral and Consultation] explode all trees
- #5 MeSH descriptor: [Decision Making] explode all trees
- #6 MeSH descriptor: [Triage] explode all trees
- #7 MeSH descriptor: [Patient Admission] explode all trees
- #8 MeSH descriptor: [Health Care Rationing] explode all trees
- #9 MeSH descriptor: [Health Priorities] explode all trees
- #10 MeSH descriptor: [Resource Allocation] explode all trees
- #11 MeSH descriptor: [Ethics] explode all trees
- #12 MeSH descriptor: [Vital Statistics] explode all trees
- #13 ration\*
- #14 refuse\*
- #15 deni\*
- #16 deny
- #17 ICU admission
- #18 triag\*
- #19 #4 or #5 or #6 or #7 or #8 or #9 or #10 or #11 or #12 or #13 or #14 or #15 or #16 or #17 or #18
- #20 #3 and #19 Publication Year from 2005 to 2016

## PubMed Health: 669 retrievals

March 1 2016

---

```
(((((("Critical Care"[Mesh]) OR "Intensive Care Units"[Mesh]))
AND
((((((((((((("Referral and Consultation"[Mesh])) OR "Decision Making"[Mesh]) OR
"Triage"[Mesh]) OR "Health Care Rationing"[Mesh]) OR "Health Priorities"[Mesh]) OR
"Bioethics"[Mesh]) OR "Vital Statistics"[Mesh]) OR ration*) OR refuse*) OR deni*) OR deny)
OR "ICU admission") OR triag*) OR benefi*))
AND
((mortality) OR survival))
```

## Pubmed (Medline): 1083 retrievals

Filters: publication date last 5 years

March 1 2016

Time 07:05:19

---

```
"Search (((intensive care[MeSH Terms]) OR intensive care unit[MeSH Terms]))
AND
(((((((refus*) OR deny) OR denied) OR triage[MeSH Terms]) OR health care rationing[MeSH
Terms]) OR allocation, resource[MeSH Terms]) OR health priorities[MeSH Terms]) OR ""ICU
admission""))
AND
mortality[MeSH Terms]"
```

## Web of Science Core Collection

Citation search for articles in the knowledge base. Time: March 7 2016. Studies from last 10 years (2006 -)

Citation search for articles included from Pubmed results. Time: March 7 2016. Studies from last 10 years (2006 -)

1. Sinuff T, Kahn moui K, Cook DJ, Luce JM, Levy MM, (2004) Rationing critical care beds: a systematic review. Crit Care Med 32: 1588-1597
2. Sprung CL, Geber D, Eidelman LA, Baras M, Pizov R, Nimrod A, Oppenheim A, Epstein L, Cotev S, (1999) Evaluation of triage decisions for intensive care admission. Crit Care Med 27: 1073-1079
3. Sprung CL, Artigas A, Kesecioglu J, Pezzi A, Wiis J, Pirracchio R, Baras M, Edbrooke DL, Pesenti A, Bakker J, Hargreaves C, Gurman G, Cohen SL, Lippert A, Payen D, Corbella D, Iapichino G, (2012) The Eldicus prospective, observational study of triage decision making in European intensive care units. Part II: intensive care benefit for the elderly. Crit Care Med 40: 132-138
4. Sprung CL, Baras M, Iapichino G, Kesecioglu J, Lippert A, Hargreaves C, Pezzi A, Pirracchio R, Edbrooke DL, Pesenti A, Bakker J, Gurman G, Cohen SL, Wiis J, Payen D, Artigas A, (2012) The Eldicus prospective, observational study of triage decision making in European intensive care units: part I--European Intensive Care Admission Triage Scores. Crit Care Med 40: 125-131

5. Sprung CL, Danis M, Iapichino G, Artigas A, Kesecioglu J, Moreno R, Lippert A, Curtis JR, Meale P, Cohen SL, Levy MM, Truog RD, (2013) Triage of intensive care patients: identifying agreement and controversy. *Intensive Care Med* 39: 1916-1924
6. Ridley S, Morris S, (2007) Cost effectiveness of adult intensive care in the UK (Structured abstract). *Anaesthesia DOI*
7. Talmor D, Shapiro N, Greenberg D, Stone PW, Neumann PJ, (2006) When is critical care medicine cost-effective? A systematic review of the cost-effectiveness literature. *Crit Care Med* 34: 2738-2747
8. Metcalfe MA, Sloggett A, McPherson K, (1997) Mortality among appropriately referred patients refused admission to intensive-care units. *Lancet* 350: 7-11
9. Garrouste-Orgeas M, Montuclard L, Timsit JF, Misset B, Christias M, Carlet J, (2003) Triaging patients to the ICU: a pilot study of factors influencing admission decisions and patient outcomes. *Intensive Care Med* 29: 774-781
10. Flaatten H, Kvale R, (2003) Cost of intensive care in a Norwegian University hospital 1997-1999. *Crit Care* 7: 72-78
11. Lindemark F, Haaland OA, Kvale R, Flaatten H, Johansson KA, (2015) Age, risk, and life expectancy in Norwegian intensive care: a registry-based population modelling study. *PLoS One* 10: e0125907
